# Supplementary material for: Designing ultrafine PdCo alloys in mesoporous silica nanospheres with peroxidase-like activity and catalase-like activity
Source: Royal Society of Chemistry journal article supplement (doi:10.1039/d0tb02963g), 2021-01-01
Supplement: d0tb02963g1.pdf [file d0tb02963g1.pdf]

## Supporting Information

### Designing Ultrafine PdCo Alloys in Mesoporous Silica Nanospheres with Peroxidase-like Activity and Catalase-like Activity

Yuzhen Li,<sup>a</sup> Hairihan Zhou,<sup>a</sup> Tongtong, Li,<sup>a</sup> Xiaoxia Jian,<sup>a</sup> Zhida Gao,<sup>\*a</sup> and Yan-Yan Song<sup>\*a</sup>

<sup>a</sup> College of Science, Northeastern University, Shenyang 110004, China

E-mail: [gaozd@mail.neu.edu.cn](mailto:gaozd@mail.neu.edu.cn), [yy-song@mail.neu.edu.cn](mailto:yy-song@mail.neu.edu.cn)

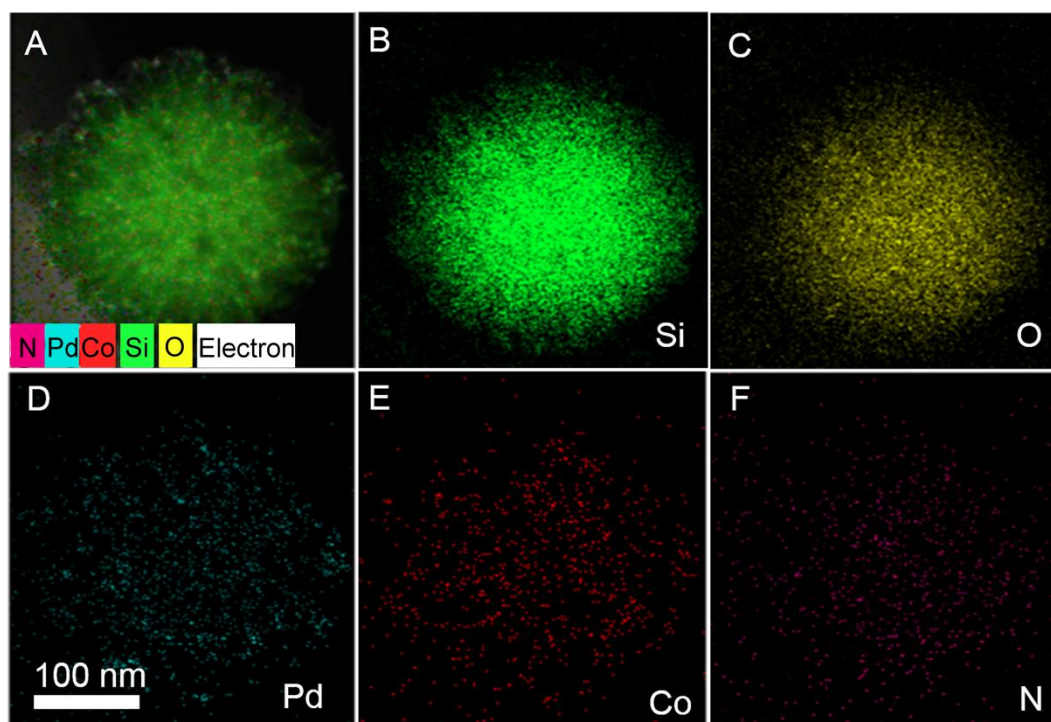

**Fig. S1** (A) EDS layered image of PdCo@MSNs. (B-F) Corresponding EDS elemental distribution of Si, O, Pd, Co, and N atoms in PdCo@MSNs.

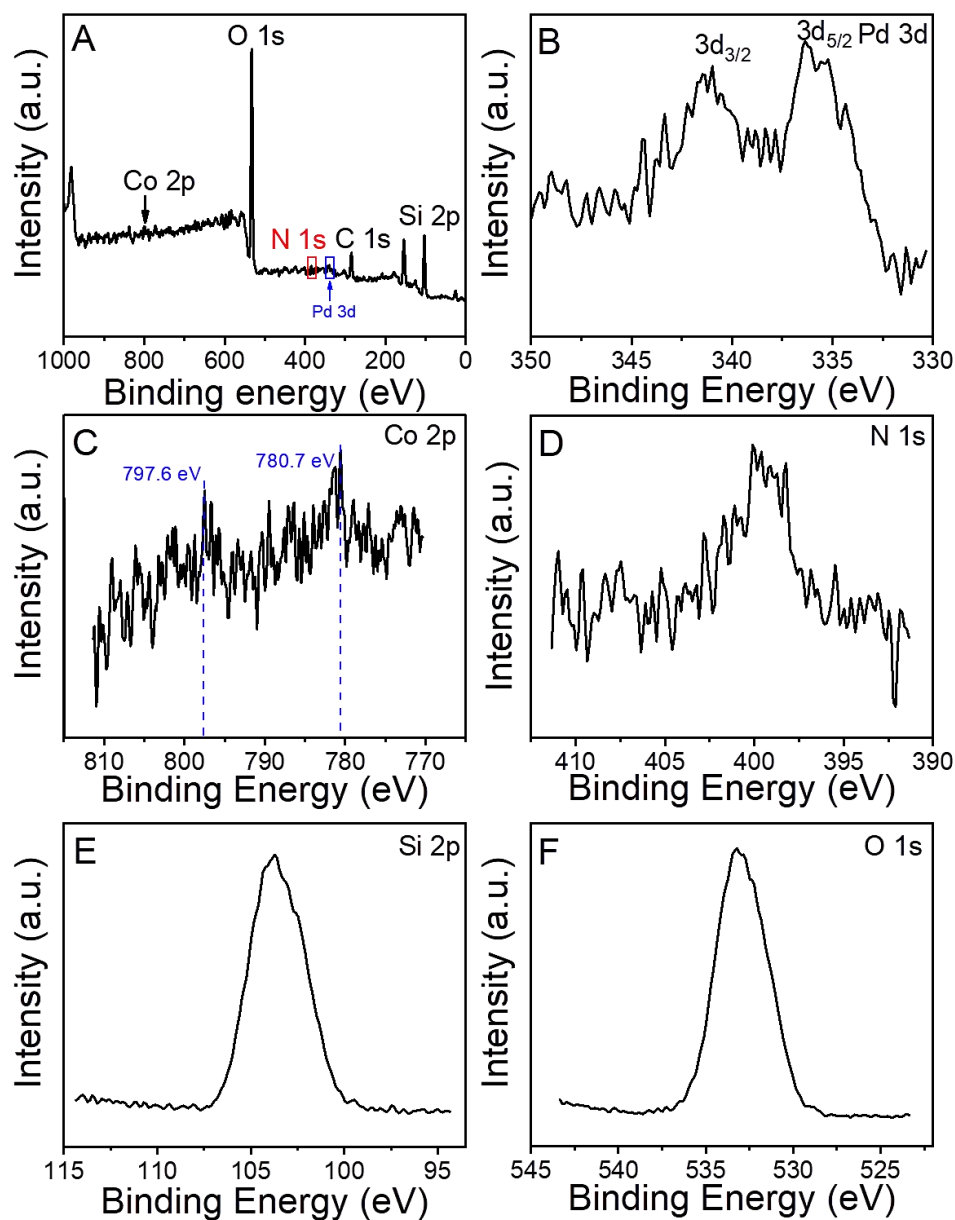

**Fig. S2** (A) XPS spectrum of PdCo@MSNs. (B-C) XPS spectra of Pd, Co, N, Si, and O of PdCo@MSNs.

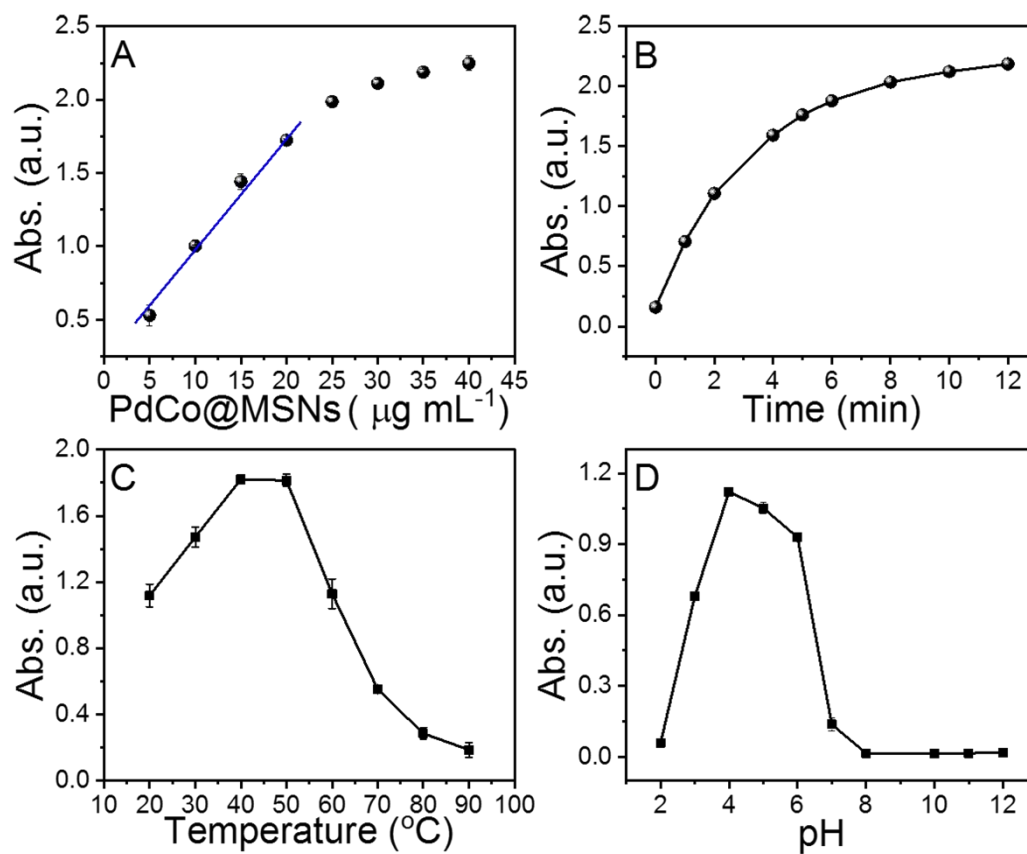

**Fig. S3** Dependence of absorbance changes of TMB at 652 nm on (A) PdCo@MSNs concentration, (B) reaction time, (C) temperature, and (D) pH of the reaction mixture.

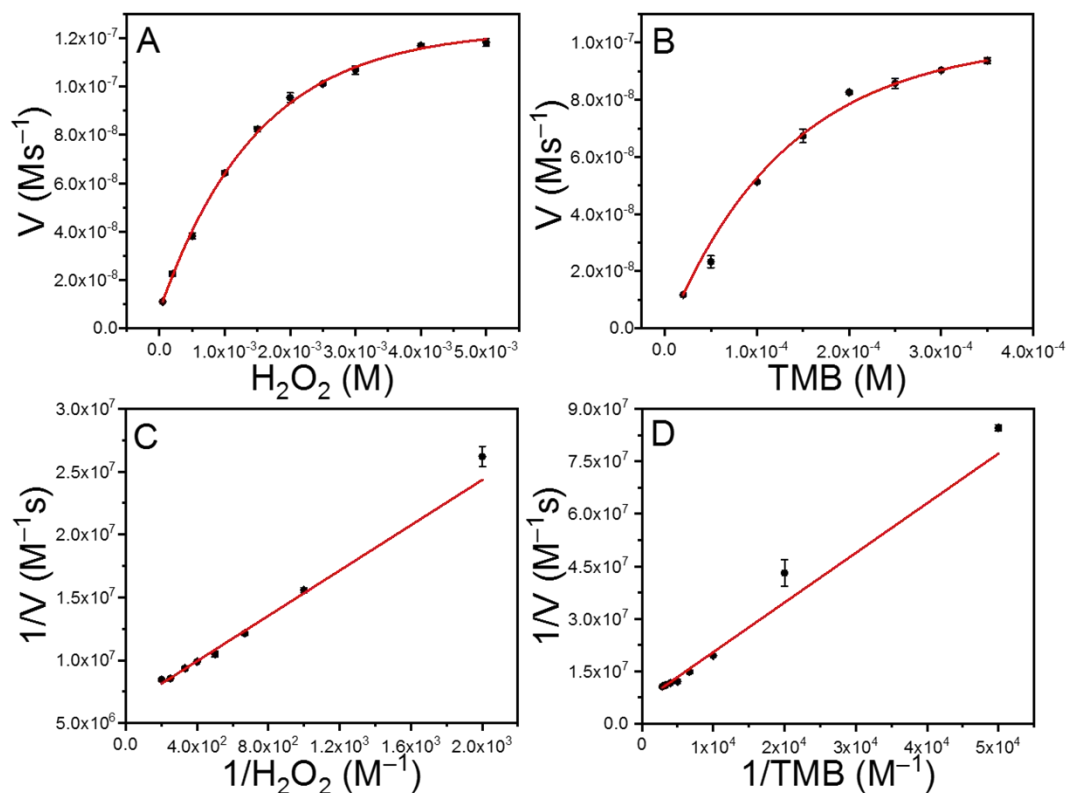

**Fig. S4** Steady-state kinetic assay of PdCo@MSNs. Reaction velocity was measured in 2 mL phosphate buffer (pH 4.0) at 40 °C containing 20  $\mu\text{g mL}^{-1}$  of PdCo@MSNs. (A) TMB concentration was 0.3 mM, and  $\text{H}_2\text{O}_2$  concentration was varied. (B)  $\text{H}_2\text{O}_2$  concentration was 2 mM, and TMB concentration was varied. (C) Double-reciprocal plots, 0.3 mM of TMB and varying concentrations of  $\text{H}_2\text{O}_2$ . (D) Double-reciprocal, 2 mM of  $\text{H}_2\text{O}_2$  and varying concentrations of TMB.

**Table S1** Comparison of the kinetics parameters for the POD-like activity of PdCo@MSNs with HRP.

| Catalyst  | Substrate                     | K <sub>m</sub> (mM) | References |
|-----------|-------------------------------|---------------------|------------|
| PdCo@MSNs | HRP                           | 0.434               | 4          |
|           | TMB                           | 3.70                |            |
|           | H <sub>2</sub> O <sub>2</sub> | 0.157               |            |
|           | TMB                           | 1.423               |            |

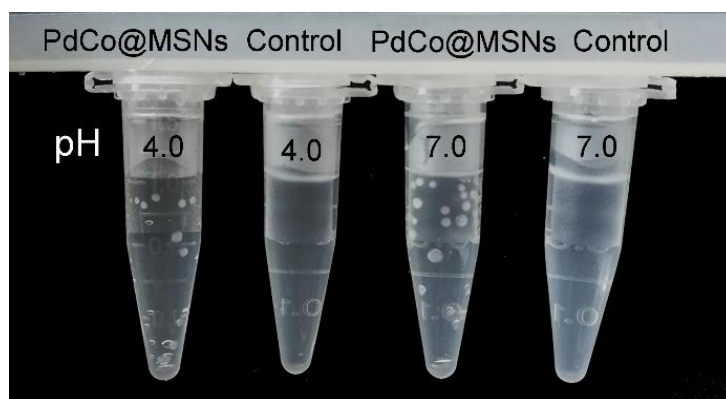

**Fig. S5** Digital photographs showing the generation of gas bubbles after 10 min incubation in a PBS solution (pH 4.0 and pH 7.0) containing  $20 \mu\text{g mL}^{-1}$  of PdCo@MSNs and 2 mM of  $\text{H}_2\text{O}_2$  or only 2 mM of  $\text{H}_2\text{O}_2$  (control groups).

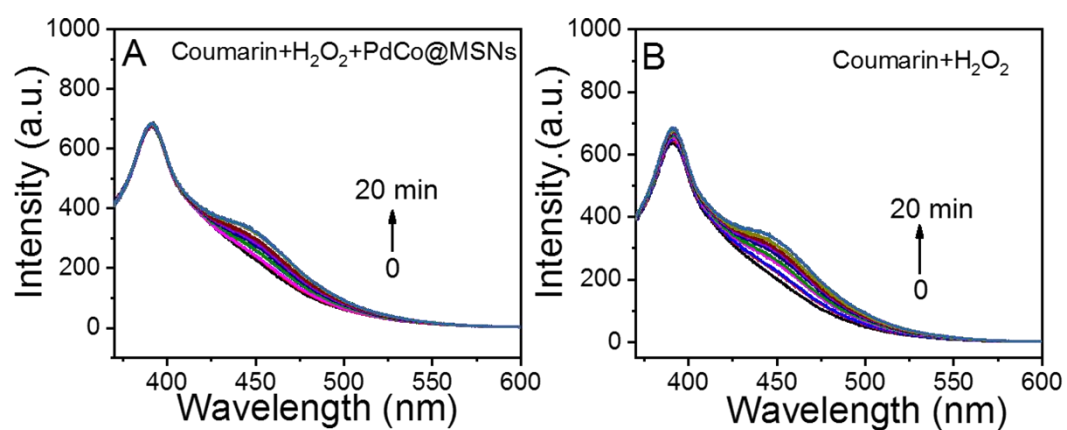

**Fig. S6** Changes in fluorescence intensity in 20 min of 20 mM PBS (pH 4.0) reaction mixture containing (A) 200  $\mu$ M of coumarin, 2 mM of H<sub>2</sub>O<sub>2</sub>, and PdCo NPs; (B) 200  $\mu$ M of coumarin, 2 mM of H<sub>2</sub>O<sub>2</sub>.

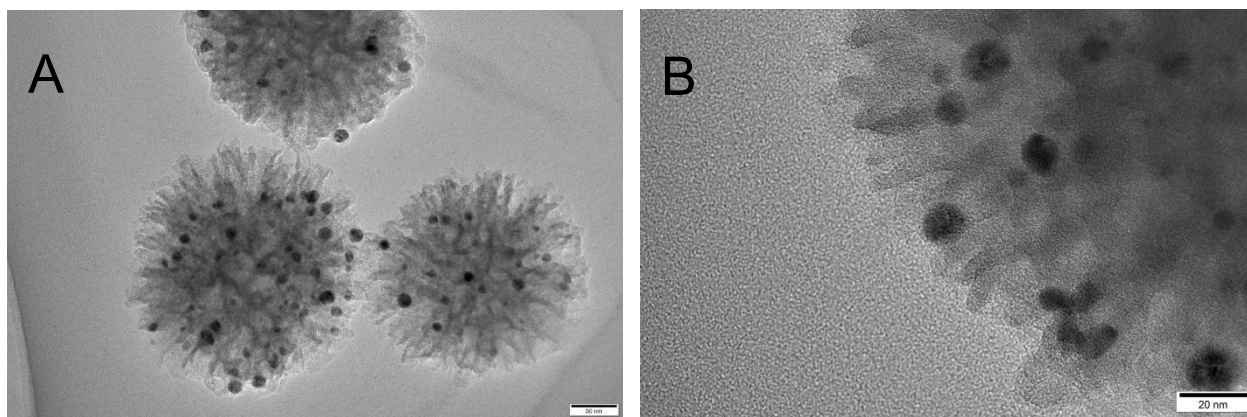

**Fig. S7** (A) and (B) TEM images of PdCo@MSNs after acid-leaching treatment.

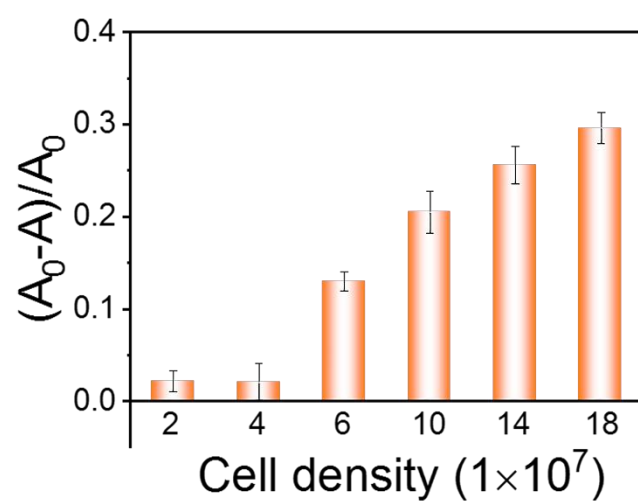

**Fig. S8** Change in  $(A_0 - A)/A_0$  with cell density.  $A$ , absorbance at 652 nm in the absence of cells.  $A_0$ , absorbance at 652 nm in the presence of cells.

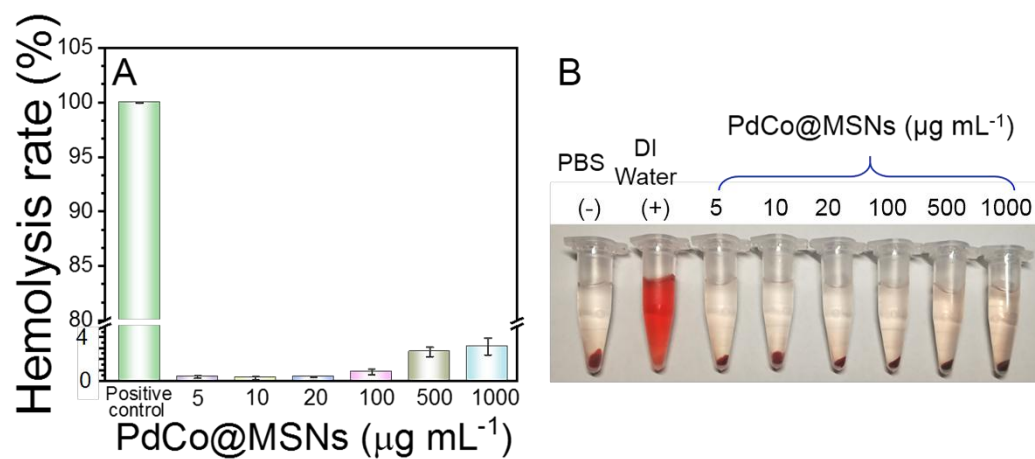

**Fig. S9** (A) Hemolysis rate of RBCs incubated with PdCo@MSNs at different concentrations. (B) Optical image of RBCs incubated with PdCo@MSNs for 4 h.
